1 **A fitness cost resulting from *Hamiltonella defensa* infection is associated with altered probing and**  
2 **feeding behaviour in *Rhopalosiphum padi***

3

4 **Running title**

5 Symbiont effects on aphid feeding

6 **Authors**

7 1. Daniel. J. Leybourne<sup>1,2,3</sup>

8 2. Tracy. A. Valentine<sup>3</sup>

9 3. Jorunn. I. B. Bos<sup>1,2</sup>

10 4. Alison. J. Karley<sup>3</sup> \*

11 <sup>1</sup> Division of Plant Sciences, School of Life Sciences, University of Dundee, Dundee, DD2 5DA UK

12 <sup>2</sup> Cell and Molecular Sciences, the James Hutton Institute, Invergowrie, Dundee, DD2 5DA, UK

13 <sup>3</sup> Ecological Sciences, the James Hutton Institute, Invergowrie, Dundee, DD2 5DA, UK

14 \* Corresponding Author: Alison.Karley@hutton.ac.uk

15 **Word Count** 4879

16 **Submission Date** 28<sup>th</sup> May 2019

17 **Keywords (3-6)**

18 Electrical penetration graph (EPG), facultative endosymbiont, insect physiology, symbiosis

19 **Summary**

20 Reduced performance of aphids infected with a common facultative endosymbiont on poor quality  
21 plants may be explained by changes in aphid probing behaviour and decreased phloem sap  
22 ingestion.

23

24

25

26

27

## 28 Abstract

29 Aphids frequently associate with facultative endosymbiotic bacteria which influence aphid  
30 physiology in myriad ways. Endosymbiont infection can increase aphid resistance against parasitoids  
31 and pathogens, modulate plant responses to aphid feeding, and promote aphid virulence. These  
32 endosymbiotic relationships can also decrease aphid fitness in the absence of natural enemies or  
33 when feeding on less suitable plant types. Here, we use the Electrical Penetration Graph (EPG)  
34 technique to monitor feeding behaviour of four genetically-similar clonal lines of a cereal-feeding  
35 aphid, *Rhopalosiphum padi*, differentially infected (+/-) with the facultative protective  
36 endosymbiont, *Hamiltonella defensa*, to understand how physiological processes at the aphid-plant  
37 interface are affected by endosymbiont infection. Endosymbiont-infected aphids exhibited altered  
38 probing and feeding patterns compared with uninfected aphids, characterised by a two-fold increase  
39 in the number of plant cell punctures, a 50% reduction in the duration of each cellular puncture, and  
40 a greater probability of achieving sustained ingestion of plant phloem. Feeding behaviour was  
41 altered further by host plant identity: endosymbiont-infected aphids spent less time probing into  
42 plant tissue, required twice as many probes into plant tissue to reach plant phloem, and showed a  
43 44% reduction in phloem ingestion when feeding on the partially-resistant wild relative of barley,  
44 *Hordeum spontaneum* 5, compared with a commercial barley cultivar. These observations might  
45 explain reduced growth of *H. defensa*-infected aphids on the former host plant. This study is the first  
46 to demonstrate a physiological mechanism at the aphid-plant interface contributing to  
47 endosymbiont effects on aphid fitness on different quality plants through altered aphid feeding  
48 behaviour.

49

50

51

52

53

54

55

56

57

58

## 59 Introduction

60 Aphids are major pests of agricultural and horticultural crops with worldwide distribution (Van  
61 Emden and Harrington, 2017). To feed they probe into plants using specialised mouthparts known as  
62 stylets, with the aim of establishing a feeding site in the plant phloem. While probing into plant  
63 tissues, aphids can transmit plant viruses (Powell, 2005), which are the main cause of economic crop  
64 losses resulting from aphid infestation. Most aphid species harbour the obligate bacterial  
65 endosymbiont *Buchnera aphidicola*, which supplies aphids with essential amino acids they are  
66 unable to biosynthesise (Sasaki et al., 1991; Douglas and Prosser, 1992). Additional co-obligatory  
67 symbiotic relationships have been described with other endosymbiont species, including *Wolbachia*  
68 *sp.* in the banana aphid, *Pentalonia nigronervosa* (De Clerck et al., 2015)(although see Manzano-  
69 Marín, 2019 preprint for updated analysis), and with *Serratia symbiotica* in multiple species of the  
70 *Cinara* genus (Meseguer et al., 2017). In most other aphid species, however, these co-infecting  
71 endosymbionts are not essential for survival. Alongside obligatory endosymbiotic relationships,  
72 aphids can form facultative (non-essential) endosymbiotic relationships with a range of  
73 microorganisms.

74 The diversity and frequency of infection with facultative endosymbionts can vary considerably  
75 between and within aphid species (de la Peña et al., 2014; Henry et al., 2015; Zytynska and Weisser,  
76 2016; Guo et al., 2019). The eleven most common facultative endosymbionts are *Hamiltonella*  
77 *defensa*, *Regiella insecticola*, *S. symbiotica*, *Rickettsia sp.*, *Rickettsiella sp.*, the *Pea Aphid X-type*  
78 *Symbiont* (PAXS), *Spiroplasma sp.*, *Wolbachia sp.*, *Arsenophonus sp.*, *Sitobion miscanthis* L-type  
79 *Symbiont* (SMLS), and *Orientia-Like Organism* (OLO) (Oliver et al., 2006; Castañeda et al., 2010;  
80 Tsuchida et al., 2010; Łukasik et al., 2013a; de la Peña et al., 2014; Leybourne et al., 2018). A meta-  
81 analysis of endosymbiont infection frequencies by Zytynska and Weisser (2016) assessed the  
82 proportion of aphid species shown to harbour *H. defensa*, *R. insecticola*, *S. symbiotica*, *Rickettsia sp.*,  
83 *Spiroplasma sp.*, PAXS, *Arsenophonus sp.* and *Wolbachia sp.* infections. The number of aphid species  
84 tested for each endosymbiont varied from 14 aphid species tested for PAXS infection, to 190 aphid  
85 species tested for *Wolbachia* infections (Zytynska and Weisser, 2016). This analysis found that the  
86 most frequently detected endosymbiont in aphids is *Serratia symbiotica* (47% of the 156 aphid  
87 species tested were infected) with *Arsenophonus sp.* the least frequently detected (7% of the 131  
88 aphid species tested were infected) (Zytynska and Weisser, 2016).

89 The benefits of aphid infection with nine of these endosymbionts has recently been reviewed by Guo  
90 et al. (2017) and a meta-analysis of the costs and benefits of facultative endosymbiont infection has

recently been conducted by Zytynska et al. (2019 preprint). Beneficial traits conferred to the aphid by the endosymbionts include protection against parasitism by Braconid wasps (*H. defensa* and *R. insecticola*; Hansen et al. (2012); Leybourne et al. (2018)), protection against entomopathogenic fungi (*R. insecticola*, *Rickettsia* sp., *Rickettsiella* sp. and *Spiroplasma* sp.; Łukasik et al. (2013b)), host-plant adaptation (*Arsenophonus* sp.; Wagner et al. (2015)), heat tolerance (*S. symbiotica* and *H. defensa*, alongside *B. aphidicola* mutations; Russell and Moran (2006); Dunbar et al. (2007)), morphological changes in insect colour (*Rickettsiella* sp.; Tsuchida et al. (2010); Nikoh et al. (2018)), and enhanced aphid virulence (mixed symbiont communities; Luna et al. (2018)). Infection with endosymbionts can, however, result in negative fitness consequences for the aphid host, including decreased growth (*Rickettsia* sp.; Sakurai et al., 2005), reduced fecundity (*Spiroplasma* sp., *H. defensa*, and *S. symbiotica*; Chen et al. (2000); Castañeda et al. (2010); Li et al. (2018); Mathé-Hubert et al. (2019)), shorter aphid longevity (*Spiroplasma* sp. and *S. symbiotica*; Chen et al. (2000); Mathé-Hubert et al. (2019)), lower adult mass (*S. symbiotica*; Skaljic et al. (2018)), and increased susceptibility to insecticide (*S. symbiotica*; Skaljic et al. (2018)).

Around one-third of 154 aphid species assessed for endosymbiont presence have been reported to harbour *H. defensa* (Zytynska and Weisser, 2016). Amongst cereal-feeding aphids, the proportion of the bird-cherry oat aphid, *Rhopalosiphum padi*, populations infected with the defensive endosymbiont, *H. defensa*, is around 10.8% (63/585 individuals; Guo et al., (2019)). The primary trait conferred to aphids infected with *H. defensa* is protection against parasitism by Braconid wasps (Oliver and Higashi, 2019). This protective phenotype often depends on the association of *H. defensa* with virulent strains of the bacteriophage APSE (*Acyrtosiphon pisum* Secondary Endosymbiont) which secretes toxins that arrest the development of the parasitoid wasp larvae (Brandt et al., 2017). A recent study has shown that *H. defensa* infection can alter interactions at the aphid-plant interface by influencing aphid probing behaviour (Angelella et al., 2018). This observation suggests that altered aphid probing behaviour could affect aphid fitness by altering feeding success and thus potentially impacting on aphid nutrition. Indeed, *H. defensa*-infection has been shown to have consequences for aphid fitness (Castañeda et al., 2010; Vorburger and Gouskov, 2011; Li et al., 2018; Zytynska et al., 2019 preprint), and examining these symbiont effects in relation to aphid probing behaviour could elucidate the mechanistic processes contributing towards symbiont-associated fitness consequences.

The Electrical Penetration Graph (EPG) technique is an electrophysiological tool used to monitor the probing and feeding behaviour of sap-feeding insects (Tjallingii, 1985; Tjallingii and Esch, 1993; Prado and Tjallingii, 1994) and has been used successfully to monitor the feeding and probing behaviour of aphids (Greenslade et al., 2016), whiteflies (Chesnais and Mauck, 2018), psyllids (Civolani et al.,

2011) and planthoppers (He et al., 2011). The technique is based on an electrical circuit which is made by inserting conductive copper probes into the soil around the plant and adhering conductive wire onto the dorsum of the aphids (Tjallingii, 1978; Tjallingii, 1985). Both probes are connected to a data logger and computational software. An electrical current is passed through the circuit, which is closed when the aphid stylet comes into contact with plant tissue, and the resulting electrical waveforms can be characterised to provide information on aphid stylet activities (probing and feeding behaviour) (Kimmins and Tjallingii, 1985; Tjallingii and Esch, 1993; Prado and Tjallingii, 1994; Tjallingii et al., 2010). Different electrical waveforms obtained from EPG recordings in aphids correspond with stylet activities in specific cell layers (Sarria et al., 2009), including in the mesophyll tissue (pathway, C, phase), xylem (G phase – xylem ingestion), and phloem (E phase, split into E1 – salivation into the phloem, E2 – ingestion of phloem sap, and sE2 – prolonged ingestion of phloem for a period of time > 10 mins). Alongside these main phases, waveforms can also relate to difficulties in stylet penetration of plant tissue (F phase), salivation into the extracellular space (E1e), and stylet puncture of cells within the mesophyll tissue (pd) (Sarria et al., 2009; Tjallingii et al., 2010). A primary use of the EPG technique has been to identify plant tissue types involved in plant resistance against sap-feeding pests (Alvarez et al., 2006; Greenslade et al., 2016). However, the EPG technique can also be employed to examine insect physiological responses to a myriad of biotic and abiotic factors, such as environmental stress (Ponder et al., 2000), plant disease status (Angelella et al., 2018), plant association with mycorrhiza (Simon et al., 2017), and disruption of the obligate aphid endosymbiont *B. aphidicola* (Machado-Assef and Alvarez, 2018).

In the current study we use the EPG technique to examine aphid feeding on a susceptible modern cultivar of barley, *Hordeum vulgare* cv. Concerto, and a wild relative of barley with partial-resistance against aphids, *H. spontaneum* 5 (Hsp5) (Delp et al., 2009). Hsp5 is particularly unsuitable as a host for *H. defensa*-infected *R. padi* (Leybourne et al., 2018). We analysed aphid feeding behaviour to test two complementary hypotheses: 1) that infection with *H. defensa* can lead to altered aphid probing and feeding behaviour; 2) that differential aphid probing and feeding behaviour between uninfected and *H. defensa*-infected aphids is a key contributor towards the decreased fitness of *H. defensa*-infected aphids feeding on partially-resistant Hsp5. In support of the first hypothesis we observed that, irrespective of plant type, aphids infected with *H. defensa* exhibited differential physiological behaviour relating to stylet interactions with the mesophyll tissue and the phloem sap. For example, infected aphids probed intracellularly within mesophyll tissue more frequently, salivated into the phloem for a shorter period of time, and were more likely to establish sustained phloem feeding. Furthermore, in support of the second hypothesis, we also observed that, compared with uninfected aphids, *H. defensa*-infected aphids on Hsp5 spent less time probing into plant tissue, required twice

as many tissue probes in order to reach the phloem sap, and showed a significant reduction in time spent ingesting phloem. Our work provides novel information about the mechanisms (decreased probing into plant tissue and reduced phloem access) that contribute towards the fitness consequences for *H. defensa*-infected aphids feeding on a less suitable plant host.

## Materials and Methods

### *Plant growth and aphid rearing conditions*

Barley seeds, *Hordeum vulgare* cv. Concerto (Linnaeus) (Concerto), and wild barley seeds, *H. spontaneum* (Linnaeus) 5 (Hsp5) were surface sterilised by washing in 2% (v/v) hypochlorite solution and rinsed in deionised water. Concerto seeds were kept in the dark at room temperature for 48 h to germinate whereas Hsp5 seeds were incubated at 4°C in the dark for 14 days to synchronise germination. Plants were grown to the true-leaf stage of development (1.2 on the scale described in Zadoks et al. (1974)) before use in aphid fitness and EPG experiments.

Asexual laboratory clonal cultures of the bird cherry-oat aphid, *Rhopalosiphum padi* (Linnaeus), were reared on one week old barley seedlings (cv. Optic) contained in ventilated cups and maintained at 18 ± 2°C and 16h:8h (day:night). *R. padi* lines were previously genotyped and characterised for the presence of facultative endosymbionts (Leybourne et al., 2018). Prior to experimentation, the presence of the defensive endosymbiont *Hamiltonella defensa* (Moran et al., 2005) was confirmed by PCR on a ProFlex PCR system (Applied Biosystems, UK) with PCR conditions as follows: 95°C for 2 min followed by 35 cycles of 95°C for 30s, 55°C for 30s and 72 °C for 3 min with a final extension stage of 72°C for 5 min; the final reaction solution consisted of 1X Green GoTaq® reaction buffer (Promega, UK) containing 1 µmol forward primer (PABSF: 5' – AGCGCAGTTTACTGAGTTCA – 3' (Darby and Douglas, 2003), 1 µmol reverse primer (16SB1 5' - TACGGYTACCTTGTTACGACTT -3' (Fukatsu et al., 2000), 1.25 U GoTaq® DNA Polymerase (Promega, UK) and 1.5 mmol MgCl<sub>2</sub>.

### *Electrical Penetration Graph (EPG) aphid feeding assessment*

The DC-EPG technique (Tjallingii, 1978; Tjallingii, 1988) was employed to monitor probing and feeding behaviour of four *R. padi* lines representing one aphid genotype with differential infection with the aphid endosymbiont, *H. defensa*: DL 16/04 (*Hd*+), DL 16/05 (*Hd*+), DL 16/06 (*Hd*-) and DL 16/13 (*Hd*-). Recordings were taken over a six-hour period using a Giga-4 DC-EPG device (EPG Systems, The Netherlands). Aphids were adhered to aphid probes (a copper wire, 3 cm x 0.2 cm, soldered to a brass pin, tip width 0.2 cm) by attaching 3 cm of gold wire (20 µm diameter; EPG Systems, The Netherlands) to the aphid probe using water-based silver glue (EPG Systems, The Netherlands) and adhering the free end of the wire to the aphid dorsum using the same water-based

adhesive. A plant probe (copper rod approximately 5 cm x 0.5 cm) was created by soldering the copper rod to electrical wire extending from the plant voltage output of the Giga-4 device. The wired aphid was attached to the Giga-4 device by placing the end of the brass pin into the EPG probe and the copper rod was then placed into the plant soil. Recordings were taken with a 1G  $\Omega$  input resistance and a 50 x gain (Tjallingii, 1988), for six hours per read. The order of *R. padi* – plant combinations and allocation to EPG probe was randomised, and Stylet+D software (EPG Systems, The Netherlands) was used for data acquisition. Aphids were lowered onto plant leaves immediately after the recording started. All EPG recordings were taken in a grounded Faraday cage. Ten replicates were recorded for *H. defensa*-infected aphids on Concerto, 11 for *H. defensa*-infected aphids on Hsp5, 14 for uninfected aphids on Concerto, and 14 for uninfected aphids on Hsp5. EPG waveforms were annotated using Stylet+A software (EPG Systems, The Netherlands) by assigning waveforms to np (non-probing), C (stylet penetration/pathway), pd (potential-drop/intercellular punctures), the pd sub-phases (pd-II1, pd-II2, pd-II3), E1e (extracellular saliva secretion), E1 (saliva secretion into phloem), E2 (saliva secretion and passive phloem ingestion), F (penetration difficulty) or G (xylem ingestion) phases (Tjallingii, 1988; Alvarez et al., 2006). Annotated waveforms were converted into time-series data using the excel workbook for automatic parameter calculation of EPG data (Sarria et al., 2009).

### ***Aphid fitness experiments***

The aphid fitness study was split into two temporal blocks with seven fully-randomised sub-blocks within each temporal block; each sub-block consisted of one replicate for each plant-aphid-combination: two plant types (Hsp5, Concerto) x four aphid treatments (DL 16/04, DL 16/05, DL 16/06, DL 16/13) giving eight treatments with 14 replicates each. One apterous *R. padi* adult from the four aphid lines described above was taken from culture, placed in a perspex clip-cage (MacGillivray and Anderson, 1957), attached to the first true leaf and left to reproduce overnight. After 24 h the adult was removed and the resulting progeny were retained on the plant leaf; the mean mass of two nymphs was recorded at 48 h and 114 h and used to calculate the nymph mass gain over this 96 h period. We have previously characterised *R. padi* fitness in relation to *H. defensa*-infection (nymph mass, fecundity, survival) and detected a fitness consequence for nymph mass gain in *H. defensa*-infected aphids (Leybourne et al., 2018). As such, we only measured nymph mass in this current study.

### ***Statistical analysis***

All statistical analyses were carried out using R Studio Desktop version 1.0.143 running R version 3.4.3 (R Core Team, 2017), with additional packages car v.2.1-4 (Fox and Weisberg, 2011), ggplot2 v.2.2.1 (Wickham, 2009), ggpubr v. 0.1.2 (Kassambara, 2017), lme4 v.1.1-13 (Bates et al., 2015), lmerTest v.2.0-33 (Kuznetsova et al., 2017), lsmeans v.2.27-62 (Lenth, 2016), multcomp v.1.4-8 (Hothorn et al., 2008), pastecs v.1.3.21 (Grosjean and Ibanez, 2014), and vegan v.2.4-6 (Oksanen et al., 2013).

Data were combined into two endosymbiont treatments: *H. defensa*-infected (comprising the DL 16/04 and DL 16/05 clonal lines) and *H. defensa*-uninfected (comprising the DL 16/06 and DL 16/13 clonal lines). Aphid feeding behaviour was first assessed globally by fitting a permuted multiple analysis of variance to the dataset. Individual feeding parameters from the EPG experiment and aphid juvenile mass gain from the aphid fitness experiment were then analysed in individual linear mixed effects models. Within each model, aphid clonal line was included as a nested factor within endosymbiont infection status to account for the use of multiple clonal lines of genetically similar aphids with differential endosymbiont infection status, as done previously (Leybourne et al., 2018). For the individual EPG parameters, EPG run (blocking factor) and the EPG probe used were included as random factors (there were 3 EPG probes used over the lifetime of the experiment). For the juvenile mass gain model, experimental block and temporal block were incorporated as random factors. All data were modelled against host plant, aphid endosymbiont infection status, and the interaction.  $\chi^2$  analysis of deviance tests were used to analyse the final models for the individual EPG parameters and analysis of variance with type III Satterthwaite approximation for degrees of freedom was used to analyse the final aphid fitness model. Calculation of the Least Squares Means was used as a *post-hoc* test on all models with a significant interaction term. All final models were checked for model suitability by observing the fitted-residual plots.

## Results

We used the EPG technique to monitor the probing and feeding behaviour of genetically-similar *Rhopalosiphum padi* clonal lines with and without *H. defensa* infection when feeding on two host plants: susceptible barley (Concerto) and the partially-resistant wild relative (Hsp5). We tested two complementary hypotheses: 1) that infection with *H. defensa* can lead to altered aphid probing and feeding behaviour; 2) that differential aphid probing and feeding behaviour between uninfected and *H. defensa*-infected aphids is a key contributor towards the decreased fitness of *H. defensa*-infected aphids when feeding on partially-resistant Hsp5. We obtained 72 individual feeding parameters from the EPG analysis (displayed in tables 1 and 2, and supplementary tables 1 and 2). Global analysis of aphid feeding patterns indicated that aphid feeding behaviour was significantly affected by plant



identity ( $F_{1,43} = 3.19$ ;  $p = 0.017$ ) and the interaction between endosymbiont presence and plant identity ( $F_{1,43} = 2.71$ ;  $p = 0.037$ ). From the 72 parameters obtained, seven parameters were affected by plant identity alone (Table S1), however these parameters are not presented or discussed in detail here as we recently characterised *R. padi* feeding responses to plant identity in a separate study (see Leybourne et al. 2019). In support of hypothesis 1, a total of 11 parameters were primarily influenced by endosymbiont infection, and these were mainly associated with stylet intracellular punctures and interaction with the phloem (Table 1; Fig. 1). A further 15 parameters were differentially affected by the endosymbiont infection x host plant interaction (supporting hypothesis 2), and these involved stylet interactions with the plant surface, the mesophyll tissue, and the phloem (Table 2; Fig 2). The remaining 39 non-significant parameters are displayed in Table S2.

# ***Cellular punctures and phloem feeding are more frequent in aphids infected with the defensive facultative endosymbiont Hamiltonella defensa***

During the six-hour EPG recording, 11 feeding parameters were affected similarly by endosymbiont infection for aphids feeding on Concerto and Hsp5 (Table 1), supporting our first hypothesis that infection with *H. defensa* can lead to altered aphid probing and feeding behaviour. Most of these feeding parameters related to aphid stylet activities in the mesophyll tissue, specifically the frequency and duration of the exploratory intracellular punctures (EPG waveform pd) performed by aphids while probing into plant tissue, and stylet interaction with phloem sap. The average duration of each C phase (stylet interaction with and movement through the mesophyll tissue) was around 25-30% shorter in *H. defensa*-infected aphids compared with uninfected aphids (Table 1; Fig. 1A). The total number of intracellular punctures (pd) made by *H. defensa* infected aphids was around two-fold higher than those made by uninfected aphids (Table 1; Fig 1B). Furthermore, following the first stylet probe into plant tissue, the first intracellular puncture (pd) occurred more rapidly for infected aphids (Table 1). Although the frequency of intracellular punctures increased in *H. defensa* infected aphids (Table 1; Fig. 1B), the duration of these intracellular punctures was on average 50% shorter for infected aphids compared with uninfected aphids (Table 1; Fig. 1C). The frequency of these intracellular punctures was highest and their duration shortest in the first hour (Table 1). Following this, the frequency of intracellular punctures in the second to sixth hours was not affected by endosymbiont presence, although the duration of intracellular punctures was influenced by symbiont presence in the second and sixth hours of EPG monitoring (Table 1).

Three aphid feeding parameters relating to stylet activity in the vascular tissue were affected by endosymbiont presence (Table 1; Fig. 1D-F): aphids infected with *H. defensa* showed a 50%

reduction in time spent salivating into the phloem during stylet contact with the phloem (Table 1; Fig. 1D), displayed a 33% increase in phloem ingestion during stylet contact with the phloem (Table 1; Fig. 1E) and had a higher proportion of phloem sap ingestion phases (E2 phases) containing a period of sustained phloem sap ingestion (sE2 – a period of ingestion > 10 mins) (Table 1; Fig. 1F).

### ***Interactive effects of plant partial-resistance against aphids with aphid endosymbiont infection***

In line with previous findings (Leybourne et al., 2018), the mass gain of *R. padi* nymphs was reduced when feeding on the partially-resistant wild relative of barley Hsp5 compared with aphids feeding on the susceptible modern cultivar of barley Concerto (ANOVA plant species:  $F_{1,93} = 122.57$ ;  $p = <0.001$ ; Fig. S1), although endosymbiont presence/absence alone did not affect aphid fitness (ANOVA endosymbiont:  $F_{1,93} = 0.42$ ;  $p = 0.514$ ). The growth of aphids infected with *H. defensa* was further reduced by 22% when aphids were feeding on Hsp5 (ANOVA plant species x endosymbiont interaction:  $F_{1,93} = 6.35$ ;  $p = 0.013$ ; Fig. S1). To examine whether alterations in aphid probing and feeding behaviour contributed towards this fitness cost, we identified EPG parameters responding differentially to endosymbiont infection on each plant type.

Fifteen EPG parameters were significantly affected by the endosymbiont infection x plant type interaction (Table 2). Eleven of these were differentially affected by *H. defensa*-infection for aphids contained on Hsp5 (Table 2). These data indicated that, in support of our second hypothesis (that differential aphid probing and feeding behaviour between uninfected and *H. defensa*-infected aphids is a key contributor towards the decreased fitness of *H. defensa*-infected aphids feeding on partially-resistant Hsp5), altered aphid probing and feeding behaviour could contribute towards decreased fitness of *H. defensa*-infected aphids on this less suitable plant (Fig. S1). When interacting with Hsp5, infected aphids spent 9% less time probing into plant tissue compared with uninfected aphids (Table 2), resulting in an overall reduction in the total time spent probing into plant tissue (Table 2; Fig. 3A). Although there was no difference in the number of non-probing phases between *H. defensa*-infected and uninfected aphids when feeding on Hsp5 (Table 2), *H. defensa*-infected aphids spent longer periods not probing into the plant tissue (Table 2). Furthermore, the duration of the first probe into plant tissue by *H. defensa*-infected aphids feeding on Hsp5 was around six-fold shorter compared with uninfected aphids (Table 2; Fig. 2B), and *H. defensa*-infected aphids required twice as many probes into plant tissue before the phloem was reached compared with uninfected aphids (Table 2; Fig. 2C). The total time spent ingesting phloem was reduced by 44% for *H. defensa*-infected aphids feeding on Hsp5 compared with uninfected aphids (Table 2; Fig. 2D) and the longest observed period of phloem ingestion was three-fold shorter for *H. defensa*-infected aphids compared with uninfected aphids when feeding on Hsp5 (Table 2; Fig. 2E).

Infection with *H. defensa* also altered the feeding behaviour of *R. padi* when probing into the susceptible barley cv. Concerto: *H. defensa*-infected aphids achieved sustained phloem sap ingestion two-fold faster than uninfected aphids (Table 2; Fig. 2F), however this did not affect aphid growth (Fig. S1).

## Discussion

By analysing aphid feeding behaviour, our study provides novel mechanistic insights into the consequences of *Hamiltonella defensa* infection for interactions at the aphid-plant interface and shows that *H. defensa*-infection can alter aphid probing behaviour, irrespective of host plant suitability, with potential consequences for insect fitness. In addition to this, our data show that these interactions can be influenced by plant susceptibility to, or resistance against, aphids and we provide novel evidence showing that aphid physiological processes are differentially affected by endosymbiont presence and host plant suitability which, at least in part, explains a fitness cost associated with *H. defensa*-infection for *R. padi* when feeding on a poor quality (partially-resistant) host plant.

### ***Endosymbiont infection alters aphid exploratory probing into plant cells and promotes phloem ingestion***

When probing into plant tissue, *H. defensa*-infected aphids displayed a characteristic pattern of more frequent and shorter exploratory intracellular punctures (EPG waveform pd) than uninfected aphids. The precise cause of this symbiont-associated effect on aphid probing is not clear, although a similar pattern was recently reported in *H. defensa*-infected cowpea aphids, *Aphis craccivora* (Angelella et al., 2018), and it is likely that changes in intracellular puncture frequency will affect the transmission of plant viruses (Ferreles and Collar, 2001; Powell, 2005). A key difference between our study and the previous work of Angelella et al. (2018) was that *R. padi* infected with *H. defensa* also showed differential feeding behaviour caused by altered stylet activities within the phloem. *H. defensa*-infected aphids spent less time salivating into the phloem and showed an overall increase in the percentage of phloem phases which contained phloem ingestion, including an increased proportion of these containing periods of sustained phloem ingestion. Altered aphid probing and feeding behaviour did not appear to affect aphid fitness directly as no overall effect of *H. defensa* infection on *R. padi* growth, development, fecundity, or longevity was detected (present study; Leybourne et al., 2018). However, *H. defensa*-infection can affect aphid fitness in other species (Zytynska et al., 2019 preprint) and differential feeding behaviour in *H. defensa*-infected aphids could be associated with these altered aphid phenotypes, including an increased adult body mass and enhanced offspring production in black bean aphids, *A. fabae* (Castañeda et al., 2010).

Endosymbiont-induced changes in feeding behaviour might be due to indirect effects of the bacterium on stylet activities mediated by bacterium-derived salivary factors (Su et al., 2015; Frago et al., 2017).

The extent of these endosymbiont-derived fitness consequences can often be dependent on aphid clonal line or aphid genotype (Castañeda et al., 2010) and it is important to note that endosymbiont-conferred traits vary between different aphid lines, aphid genotypes, and aphid species (Castañeda et al., 2010; Vorburger and Gouskov, 2011; Leybourne et al., 2018): indeed, *H. defensa*-infection can also reduce *A. fabae* reproductive rate and survivorship (Vorburger and Gouskov, 2011) and decrease *S. avenae* fecundity (Li et al., 2018). Altered probing behaviour might also explain differential plant responses to infestation by aphids infected with *H. defensa*, including changes in the emission of Herbivore Induced Plant Volatile (HIPV) compounds (Frago et al., 2017) and reduced dry matter allocation to roots (Hackett et al., 2013; Bennett et al., 2016). A focus for future research should include the consequences of aphid species and genotype for *H. defensa*-associated modifications to aphid probing and feeding behaviour to fully elucidate their effects on aphid pest status, virus transmission, and plant responses to aphid infestation.

#### ***Endosymbiont infection reduces aphid feeding on a poor quality host plant***

When probing into the partially-resistant plant, Hsp5, aphids infected with *H. defensa* showed a differential physiological feeding pattern compared with uninfected aphids, including a reduction in the time spent probing into plant tissue, an increase in the number of plant tissue probes required to reach the phloem tissue, and a decrease in total phloem ingestion. This was linked with decreased fitness in *H. defensa*-infected aphids compared with uninfected aphids when feeding on Hsp5, in line with our previous findings (Leybourne et al., 2018). A decrease in the duration of the first probe into plant tissue, and an overall reduction in time spent probing into the plant tissue, are representative of mesophyll- and epidermal-derived factors which inhibit and impede the penetration of the aphid stylet through the plant tissue, as highlighted by Alvarez et al. (2006). A similar fitness cost associated with *H. defensa*-infected aphids has been observed previously in *A. fabae* feeding on different quality plant species (Chandler et al., 2008), although it is not known if this was linked with altered aphid probing and feeding behaviour.

We recently characterised the partial-resistance mechanism of Hsp5 (Leybourne et al., 2019) and reported that partial-resistance involves mesophyll and phloem traits. These included an increased abundance of defensive thionins and a reduction in the availability of essential amino acids as mesophyll-derived and phloem-derived partial-resistance factors, respectively (Leybourne et al., 2019). These factors could underlie the decreased time aphids spent probing into plant tissue and

the shorter duration of the initial probe into plant tissue, although the underlying processes causing these differential feeding patterns are currently unclear. A key factor which likely contributes towards this decrease in aphid fitness is our observation that *H. defensa*-infected aphids showed a 44% reduction in time spent ingesting phloem on Hsp5 compared with uninfected aphids. It is probable that this substantial decrease in phloem ingestion contributes significantly to the 22% reduction in nymph growth we detected. Indeed, a previous study using the peach-potato aphid, *Myzus persicae*, have shown that a 58% decrease in ingestion rate can result in a 10% reduction in aphid growth (Karley et al., 2002). We also detected differential feeding patterns between *H. defensa*-infected aphids feeding on Hsp5 and Concerto: *H. defensa*-infected aphids feeding on Concerto achieved sustained phloem feeding more rapidly than those feeding on Hsp5. A faster initiation of sustained feeding could explain the higher mass of *H. defensa*-infected nymphs on Concerto. However, it is likely that our observed reduction in nymph mass for both infected and uninfected nymphs when feeding on Hsp5 compared with those feeding on Concerto is due to increased aphid resistance in Hsp5 (Leybourne et al., 2019). The rapid initiation of sustained feeding could be associated with other aphid fitness effects which are currently uncharacterised, such as the transmission or acquisition of phloem-limited viruses.

## Conclusion

In this study, two hypotheses were tested: 1) that infection with *H. defensa* can lead to altered aphid probing and feeding behaviour; 2) that differential aphid probing and feeding behaviour between uninfected and *H. defensa*-infected aphids is a key contributor towards the decreased fitness of *H. defensa*-infected aphids feeding on partially-resistant Hsp5. *R. padi* infected with the defensive facultative endosymbiont, *H. defensa*, showed altered probing and feeding behaviour compared with uninfected aphids, irrespective of plant type, including an increase in the number of intracellular punctures and in phloem ingestion, supporting our first hypothesis. Furthermore, in support of our second hypothesis, our EPG data highlight novel mechanistic processes which contribute towards an observed fitness cost arising from *H. defensa*-infection in *R. padi* feeding on the partially-resistant plant, Hsp5, which was associated with a reduction in the time aphids probe into the plant tissue, an increase in the number of plant tissue probes required to reach the phloem, and a 44% reduction in total phloem ingestion. Together, our results show that aphid facultative endosymbionts can influence aphid-plant interactions in more subtle ways than previously realised and indicate that plant suitability can exacerbate these effects.

## Acknowledgements

419 We would like to thank A. Nicholas E. Birch (James Hutton Institute) for helpful comments on the  
420 manuscript.

#### 421 **Competing Interests**

422 The authors declare no competing interests.

#### 423 **Funding**

424 DJL was funded by the James Hutton Institute and the Universities of Aberdeen and Dundee through  
425 a Scottish Food Security Alliance (Crops) PhD studentship. AJK and TAV were supported by the  
426 strategic research programme funded by the Scottish Government's Rural and Environment Science  
427 and Analytical Services Division. JIBB was supported by the European Research Council (310190-  
428 APHIDHOST).

#### 429 **Author Contributions**

430 AJK and DJL conceived and designed the experiments. DJL performed the experiments and analysed  
431 the data. All authors contributed to data interpretation. DJL wrote the manuscript with input from  
432 all authors. All authors read and approved the final manuscript.

## References

- Alvarez, A. E., Tjallingii, W. F., Garzo, E., Vleeshouwers, V., Dicke, M. and Vosman, B.** (2006). Location of resistance factors in the leaves of potato and wild tuber-bearing *Solanum* species to the aphid *Myzus persicae*. *Entomologia Experimentalis et Applicata* **121**, 145-157.
- Angelella, G., Nalam, V., Nachappa, P., White, J. and Kaplan, I.** (2018). Endosymbionts Differentially Alter Exploratory Probing Behavior of a Nonpersistent Plant Virus Vector. *Microbial Ecology* **76**, 453-458.
- Bates, D., Maechler, M., Bolker, B. and Walker, S.** (2015). Fitting Linear Mixed-Effects Models Using lme4. *Journal of Statistical Software* **67**, 1-48.
- Bennett, A. E., Millar, N. S., Gedrovics, E. and Karley, A. J.** (2016). Plant and insect microbial symbionts alter the outcome of plant–herbivore–parasitoid interactions: implications for invaded, agricultural and natural systems. *Journal of Ecology* **104**, 1734-1744.
- Brandt, J. W., Chevignon, G., Oliver, K. M. and Strand, M. R.** (2017). Culture of an aphid heritable symbiont demonstrates its direct role in defence against parasitoids. *Proceedings of the Royal Society B: Biological Sciences* **284**, dx.doi.org/10.1098/rspb.2017.1925.
- Castañeda, L. E., Sandroock, C. and Vorburger, C.** (2010). Variation and covariation of life history traits in aphids are related to infection with the facultative bacterial endosymbiont *Hamiltonella defensa*. *Biological Journal of the Linnean Society* **100**, 237-247.
- Chandler, S. M., Wilkinson, T. L. and Douglas, A. E.** (2008). Impact of plant nutrients on the relationship between a herbivorous insect and its symbiotic bacteria. *Proceedings of the Royal Society B: Biological Sciences* **275**, 565-570.
- Chen, D.-Q., Montllor, C. B. and Purcell, A. H.** (2000). Fitness effects of two facultative endosymbiotic bacteria on the pea aphid, *Acyrtosiphon pisum*, and the blue alfalfa aphid, *A. kondoi*. *Entomologia Experimentalis et Applicata* **95**, 315-323.
- Chesnais, Q. and Mauck, K. E.** (2018). Choice of Tethering Material Influences the Magnitude and Significance of Treatment Effects in Whitefly Electrical Penetration Graph Recordings. *Journal of Insect Behavior* **31**, 656-671.
- Civolani, S., Leis, M., Grandi, G., Garzo, E., Pasqualini, E., Musacchi, S., Chicca, M., Castaldelli, G., Rossi, R. and Freddy Tjallingii, W.** (2011). Stylet penetration of *Cacopsylla pyri*; an electrical penetration graph (EPG) study. *Journal of Insect Physiology* **57**, 1407-1419.
- Darby, A. and Douglas, A.** (2003). Elucidation of the transmission patterns of an insect-borne bacterium. *Applied and Environmental Microbiology* **69**, 4403-4407.
- De Clerck, C., Fujiwara, A., Joncour, P., Léonard, S., Félix, M.-L., Francis, F., Jijakli, M. H., Tsuchida, T. and Massart, S.** (2015). A metagenomic approach from aphid's hemolymph sheds light on the potential roles of co-existing endosymbionts. *Microbiome* **3**, dx.doi.org/10.1186/s40168-015-0130-5.
- de la Peña, E., Vandomme, V. and Frago, E.** (2014). Facultative endosymbionts of aphid populations from coastal dunes of the North Sea. *Belgian Journal of Zoology* **144**, 41-50.
- Delp, G., Gradin, T., Åhman, I. and Jonsson, L. M.** (2009). Microarray analysis of the interaction between the aphid *Rhopalosiphum padi* and host plants reveals both differences and similarities between susceptible and partially resistant barley lines. *Molecular Genetics and Genomics* **281**, 233-248.
- Douglas, A. E. and Prosser, W. A.** (1992). Synthesis of the essential amino acid tryptophan in the pea aphid (*Acyrtosiphon pisum*) symbiosis. *Journal of Insect Physiology* **38**, 565-568.
- Dunbar, H. E., Wilson, A. C., Ferguson, N. R. and Moran, N. A.** (2007). Aphid thermal tolerance is governed by a point mutation in bacterial symbionts. *PLoS Biol* **5**.
- Fereres, A. and Collar, J. L.** (2001). Chapter 5 - Analysis of Noncirculative Transmission by Electrical Penetration Graphs. In *Virus-Insect-Plant Interactions*, eds. K. F. Harris O. P. Smith and J. E. Duffus), pp. 87-109. San Diego: Academic Press.
- Fox, J. and Weisberg, S.** (2011). An {R} Companion to Applied Regression. Thousand Oaks, CA: Sage.

- Frago, E., Mala, M., Weldegergis, B. T., Yang, C., McLean, A., Godfray, H. C. J., Gols, R. and Dicke, M.** (2017). Symbionts protect aphids from parasitic wasps by attenuating herbivore-induced plant volatiles. *Nature Communications* **8**, dx.doi.org/10.1038/s41467-017-01935-0.
- Fukatsu, T., Nikoh, N., Kawai, R. and Koga, R.** (2000). The Secondary Endosymbiotic Bacterium of the Pea Aphid *Acyrtosiphon pisum* (Insecta: Homoptera). *Applied and Environmental Microbiology* **66**, 2748-2758.
- Greenslade, A. F. C., Ward, J. L., Martin, J. L., Corol, D. I., Clark, S. J., Smart, L. E. and Aradottir, G. I.** (2016). *Triticum monococcum* lines with distinct metabolic phenotypes and phloem-based partial resistance to the bird cherry-oat aphid *Rhopalosiphum padi*. *Annals of Applied Biology* **168**, 435-449.
- Grosjean, P. and Ibanez, F.** (2014). pastecs: Package for Analysis of Space-Time Ecological Series. *CRAN repository*.
- Guo, J., Hatt, S., He, K., Chen, J., Francis, F. and Wang, Z.** (2017). Nine facultative endosymbionts in aphids. A review. *Journal of Asia-Pacific Entomology* **20**, 794-801.
- Guo, J., Liu, X., Poncelet, N., He, K., Francis, F. and Wang, Z.** (2019). Detection and geographic distribution of seven facultative endosymbionts in two *Rhopalosiphum* aphid species. *MicrobiologyOpen*, e00817.
- Hackett, S. C., Karley, A. J. and Bennett, A. E.** (2013). Unpredicted impacts of insect endosymbionts on interactions between soil organisms, plants and aphids. *Proceedings of the Royal Society of London B: Biological Sciences* **280**.
- Hansen, A. K., Vorburger, C. and Moran, N. A.** (2012). Genomic basis of endosymbiont-conferred protection against an insect parasitoid. *Genome research* **22**, 106-114.
- He, Y., Chen, L., Chen, J., Zhang, J., Chen, L., Shen, J. and Zhu, Y. C.** (2011). Electrical penetration graph evidence that pymetrozine toxicity to the rice brown planthopper is by inhibition of phloem feeding. *Pest Management Science* **67**, 483-491.
- Henry, L. M., Maiden, M. C. J., Ferrari, J. and Godfray, H. C. J.** (2015). Insect life history and the evolution of bacterial mutualism. *Ecology letters* **18**, 516-525.
- Hothorn, T., Bretz, F. and Westfall, P.** (2008). Simultaneous Inference in General Parametric Models. *Biometrical Journal* **50**, 346-363.
- Karley, A. J., Douglas, A. E. and Parker, W. E.** (2002). Amino acid composition and nutritional quality of potato leaf phloem sap for aphids. *Journal of Experimental Biology* **205**, 3009-3018.
- Kassambara, A.** (2017). ggpubr: 'ggplot2' Bases Publication Ready Plots. *CRAN repository*.
- Kimmins, F. M. and Tjallingii, W. F.** (1985). Ultrastructure of sieve element penetration by aphid stylets during electrical recording. *Entomologia Experimentalis et Applicata* **39**, 135-141.
- Kuznetsova, A., Brockhoff, P. B. and Christensen, R. H. B.** (2017). lmerTest package: tests in linear mixed effects models. *Journal of Statistical Software* **82**, 1-26.
- Lenth, R. V.** (2016). Least-Squares Means: The R Package lsmeans. *Journal of Statistical Software* **69**, 1-33.
- Leybourne, D. J., Bos, J. I. B., Valentine, T. A. and Karley, A. J.** (2018). The price of protection: a defensive endosymbiont impairs nymph growth in the bird cherry-oat aphid, *Rhopalosiphum padi*. *Insect Science* <https://doi.org/10.1111/1744-7917.12606>
- Leybourne, D. J., Valentine, T. A., Main, A. M., Pérez-Fernández, E., Robertson, J. A. H., Karley, A. J. and Bos, J. I. B.** (2019). Defence gene expression and phloem quality contribute to mesophyll and phloem resistance against aphids in wild barley. *Journal of experimental botany*.
- Li, S., Liu, D., Zhang, R., Zhai, Y., Huang, X., Wang, D. and Shi, X.** (2018). Effects of a presumably protective endosymbiont on life-history characters and their plasticity for its host aphid on three plants. *Ecology and Evolution* **8**, 13004-13013.
- Łukasiak, P., Dawid, M. A., Ferrari, J. and Godfray, H. C. J.** (2013a). The diversity and fitness effects of infection with facultative endosymbionts in the grain aphid, *Sitobion avenae*. *Oecologia* **173**, 985-996.
- Łukasiak, P., van Asch, M., Guo, H., Ferrari, J. and Godfray, C. J.** (2013b). Unrelated facultative endosymbionts protect aphids against a fungal pathogen. *Ecology letters* **16**, 214-218.



- Luna, E., van Eck, L., Campillo, T., Weinroth, M., Metcalf, J., Perez-Quintero, A. L., Botha, A.-M., Thannhauser, T. W., Pappin, D. and Tisserat, N. A.** (2018). Bacteria Associated with Russian Wheat Aphid (*Diuraphis noxia*) Enhance Aphid Virulence to Wheat. *Phytobiomes* **2**, 151-164.
- MacGillivray, M. and Anderson, G.** (1957). Three useful insect cages. *The Canadian Entomologist* **89**, 43-46.
- Machado-Assefh, C. R. and Alvarez, A. E.** (2018). Probing behavior of aposymbiotic green peach aphid (*Myzus persicae*) on susceptible *Solanum tuberosum* and resistant *Solanum stoloniferum* plants. *Insect Science* **25**, 127-136.
- Manzano-Marín, A.** (2019). No evidence for *Wolbachia* as a nutritional co-obligate endosymbiont in the aphid *Pentalonia nigronervosa*. *bioRxiv*, 609511.
- Mathé-Hubert, H., Kaech, H., Ganesanandamoorthy, P. and Vorburger, C.** (2019). Evolutionary costs and benefits of infection with diverse strains of *Spiroplasma* in pea aphids. *Evolution* **0**.
- Meseguer, A. S., Manzano-Marín, A., d'Acier, A. C., Clamens, A. L., Godefroid, M. and Jousset, E.** (2017). Buchnera has changed flatmate but the repeated replacement of co-obligate symbionts is not associated with the ecological expansions of their aphid hosts. *Molecular Ecology* **26**, 2363-2378.
- Moran, N. A., Russell, J. A., Koga, R. and Fukatsu, T.** (2005). Evolutionary Relationships of Three New Species of Enterobacteriaceae Living as Symbionts of Aphids and Other Insects. *Applied and Environmental Microbiology* **71**, 3302-3310.
- Nikoh, N., Tsuchida, T., Maeda, T., Yamaguchi, K., Shigenobu, S., Koga, R. and Fukatsu, T.** (2018). Genomic Insight into Symbiosis-Induced Insect Color Change by a Facultative Bacterial Endosymbiont, "*Candidatus Rickettsiella viridis*". *mBio* **9**, e00890-18.
- Oksanen, J., Blanchet, F. G., Kindt, R., Legendre, P., Minchin, P. R., O'hara, R., Simpson, G. L., Solymos, P., Stevens, M. H. H. and Wagner, H.** (2013). R Package vegan: Community Ecology Package. *CRAN repository available*: <https://CRAN.R-project.org/package=vegan>.
- Oliver, K. M. and Higashi, C. H. V.** (2019). Variations on a protective theme: *Hamiltonella defensa* infections in aphids variably impact parasitoid success. *Current Opinion in Insect Science* **32**, 1-7.
- Oliver, K. M., Moran, N. A. and Hunter, M. S.** (2006). Costs and benefits of a superinfection of facultative symbionts in aphids. *Proceedings of the Royal Society B: Biological Sciences* **273**, 1273-80.
- Ponder, K. L., Pritchard, J., Harrington, R. and Bale, J. S.** (2000). Difficulties in location and acceptance of phloem sap combined with reduced concentration of phloem amino acids explain lowered performance of the aphid *Rhopalosiphum padi* on nitrogen deficient barley (*Hordeum vulgare*) seedlings. *Entomologia Experimentalis et Applicata* **97**, 203-210.
- Powell, G.** (2005). Intracellular salivation is the aphid activity associated with inoculation of non-persistently transmitted viruses. *Journal of General Virology* **86**, 469-72.
- Prado, E. and Tjallingii, W. F.** (1994). Aphid activities during sieve element punctures. *Entomologia Experimentalis et Applicata* **72**, 157-165.
- Russell, J. A. and Moran, N. A.** (2006). Costs and benefits of symbiont infection in aphids: variation among symbionts and across temperatures. *Proceedings of the Royal Society B: Biological Sciences* **273**, 603-610.
- Sakurai, M., Koga, R., Tsuchida, T., Meng, X.-Y. and Fukatsu, T.** (2005). *Rickettsia* Symbiont in the Pea Aphid *Acyrtosiphon pisum*: Novel Cellular Tropism, Effect on Host Fitness, and Interaction with the Essential Symbiont *Buchnera*. *Applied and Environmental Microbiology* **71**, 4069-4075.
- Sarria, E., Cid, M., Garzo, E. and Fereres, A.** (2009). Excel Workbook for automatic parameter calculation of EPG data. *Computers and Electronics in Agriculture* **67**, 35-42.
- Sasaki, T., Hayashi, H. and Ishikawa, H.** (1991). Growth and reproduction of the symbiotic and aposymbiotic pea aphids, *Acyrtosiphon pisum* maintained on artificial diets. *Journal of Insect Physiology* **37**, 749-756.
- Simon, A. L., Wellham, P. A. D., Aradottir, G. I. and Gange, A. C.** (2017). Unravelling mycorrhiza-induced wheat susceptibility to the English grain aphid *Sitobion avenae*. *Scientific Reports* **7**, 46497.

- Skaljac, M., Kirfel, P., Grotmann, J. and Vilcinskas, A.** (2018). Fitness costs of infection with *Serratia symbiotica* are associated with greater susceptibility to insecticides in the pea aphid *Acyrtosiphon pisum*. *Pest Management Science* **74**, 1829-1836.
- Su, Q., Oliver, K. M., Xie, W., Wu, Q., Wang, S. and Zhang, Y.** (2015). The whitefly-associated facultative symbiont *Hamiltonella defensa* suppresses induced plant defences in tomato. *Functional Ecology* **29**, 1007-1018.
- Tjallingii, W.** (1988). Electrical Recording of Stylet Penetration Activities. In *Aphids Their Biology, Natural Enemies and Control*, eds. M. AK and H. P), pp. 95 - 108. Amsterdam, The Netherlands: Elsevier.
- Tjallingii, W. F.** (1985). Electrical nature of recorded signals during stylet penetration by aphids. *Entomologia Experimentalis et Applicata* **38**, 177-186.
- Tjallingii, W. F.** (1978). Electronic recording of penetration behaviour by aphids. *Entomologia Experimentalis et Applicata* **24**, 721-730.
- Tjallingii, W. F. and Esch, H.** (1993). Fine structure of aphid stylet routes in plant tissues in correlation with EPG signals. *Physiological Entomology* **18**, 317-328.
- Tjallingii, W. F., Garzo, E. and Fereres, A.** (2010). New structure in cell puncture activities by aphid stylets: a dual-mode EPG study. *Entomologia Experimentalis et Applicata* **135**, 193-207.
- Tsuchida, T., Koga, R., Horikawa, M., Tsunoda, T., Maoka, T., Matsumoto, S., Simon, J.-C. and Fukatsu, T.** (2010). Symbiotic Bacterium Modifies Aphid Body Color. *Science* **330**, 1102-1104.
- Van Emden, H. F. and Harrington, R.** (2017). Aphids as crop pests: Cabi.
- Vorburger, C. and Gouskov, A.** (2011). Only helpful when required: a longevity cost of harbouring defensive symbionts. *Journal of Evolutionary Biology* **24**, 1611-1617.
- Wagner, S. M., Martinez, A. J., Ruan, Y.-M., Kim, K. L., Lenhart, P. A., Dehnel, A. C., Oliver, K. M. and White, J. A.** (2015). Facultative endosymbionts mediate dietary breadth in a polyphagous herbivore. *Functional Ecology* **29**, 1402-1410.
- Wickham, H.** (2009). ggplot2: Elegant Graphics for Data Analysis. New York: Springer-Verlag.
- Zadoks, J. C., Chang, T. T. and Konzak, C. F.** (1974). A decimal code for the growth stages of cereals. *Weed Research* **14**, 415-421.
- Zytynska, S. E., Thighiouart, K. and Frago, E.** (2019). A meta-analysis on the benefits and costs of hosting secondary endosymbionts in sap-sucking insects. *bioRxiv*, 563031.
- Zytynska, S. E. and Weisser, W. W.** (2016). The natural occurrence of secondary bacterial symbionts in aphids. *Ecological Entomology* **41**, 13-26.

## Figure Legends

**Fig. 1:** Aphid feeding parameters in the absence (-) and presence (+) of *Hamiltonella defensa*. - shows the combined data for both *H. defensa*-uninfected lines (DL 16/06; DL 16/13) and + shows the combined data for both *H. defensa*-infected lines (DL 16/04; DL 16/05). A-C: parameters associated with stylet puncturing of plant cells (intracellular punctures); D-F: parameters associated with stylet interaction with phloem sap. The black cross ("x") on each plot shows the mean value.

**Fig 2:** Aphid feeding parameters that were differentially affected by the absence (-) and presence (+) of *Hamiltonella defensa* infection on two plant hosts (susceptible modern barley cv. Concerto and the wild relative Hsp5). - shows the combined data for both *H. defensa*-uninfected lines (DL 16/06; DL 16/13) and + shows the combined data for both *H. defensa*-infected lines (DL 16/04; DL 16/05). Letters indicate which groups are significantly different based on pairwise comparisons using general linear hypotheses testing with single-step p-value adjustment. The black cross ("x") on each plot shows the mean value.

## Tables

**Table 1:** Aphid feeding parameters (mean value  $\pm$  standard error) that were significantly affected by the absence (-) or presence (+) of *Hamiltonella defensa* infection. Numbers in parenthesis indicate the total number of individuals which displayed each parameter, and the total number of individuals tested is indicated at the top of the column. Data marked with † display median alongside the upper and lower interquartile ranges.

| Description of Response Variable Assessed (transformation used)                                                            | Absence (-) or presence (+) of <i>Hamiltonella defensa</i> infection |                                             | Statistical results for each Explanatory Variable (generalised least square estimation models) |           |                    |            |                      |           |
|----------------------------------------------------------------------------------------------------------------------------|----------------------------------------------------------------------|---------------------------------------------|------------------------------------------------------------------------------------------------|-----------|--------------------|------------|----------------------|-----------|
|                                                                                                                            | <i>Hd</i> -ve (max = 28)                                             | <i>Hd</i> +ve (max = 21)                    | Plant                                                                                          |           | Endosymbiont       |            | Plant x Endosymbiont |           |
| Mean duration of each C (mesophyll pathway) phase (sqrt)                                                                   | 860.14 $\pm$ 94.77 s (28)                                            | 620.02 s $\pm$ 70.71 s (21)                 | $\chi^2_1 = 0.25$                                                                              | p = 0.611 | $\chi^2_1 = 4.16$  | p = 0.041  | $\chi^2_1 = 0.97$    | p = 0.323 |
| Total number of pd: potential drops (intracellular punctures) (sqrt)                                                       | 72.85 $\pm$ 6.83 (28)                                                | 163.57 $\pm$ 26.02 (21)                     | $\chi^2_1 = 0.52$                                                                              | p = 0.470 | $\chi^2_1 = 18.49$ | p = <0.001 | $\chi^2_1 = 3.78$    | p = 0.051 |
| Mean duration of each pd (not transformed)                                                                                 | 4.53 s $\pm$ 0.17 s (28)                                             | 2.66 s $\pm$ 0.28 s (21)                    | $\chi^2_1 = 0.03$                                                                              | p = 0.843 | $\chi^2_1 = 40.99$ | p = <0.001 | $\chi^2_1 = 0.74$    | p = 0.389 |
| Time from start of aphid probe into plant tissue to first pd (not transformed)                                             | 529.41 $\pm$ 206.43 (28)                                             | 117.75 s $\pm$ 36.49 s (21)                 | $\chi^2_1 = 2.09$                                                                              | p = 0.147 | $\chi^2_1 = 2.87$  | p = 0.008  | $\chi^2_1 = 1.58$    | p = 0.208 |
| Total number of pd in first hour (sqrt)                                                                                    | 15.35 $\pm$ 2.29 (28)                                                | 61.52 $\pm$ 14.58 (21)                      | $\chi^2_1 = 0.02$                                                                              | p = 0.871 | $\chi^2_1 = 14.67$ | p = 0.001  | $\chi^2_1 = 1.25$    | p = 0.262 |
| Mean duration of each pd in first hour (not transformed)                                                                   | 4.19 s $\pm$ 0.29 s (28)                                             | 2.39 s $\pm$ 0.32 s (21)                    | $\chi^2_1 = 0.01$                                                                              | p = 0.977 | $\chi^2_1 = 16.62$ | p = <0.001 | $\chi^2_1 = 0.001$   | p = 0.994 |
| Mean duration of each pd in second hour (not transformed)                                                                  | 4.81 $\pm$ 0.30 s (21)                                               | 3.14 $\pm$ 0.47 (17)                        | $\chi^2_1 = 0.59$                                                                              | p = 0.439 | $\chi^2_1 = 10.01$ | p = 0.001  | $\chi^2_1 = 1.62$    | p = 0.202 |
| Mean duration of each pd in sixth hour (not transformed)                                                                   | 4.84 $\pm$ 0.19 (13)                                                 | 3.57 $\pm$ 0.29 (13)                        | $\chi^2_1 = 0.92$                                                                              | p = 0.335 | $\chi^2_1 = 5.13$  | p = 0.023  | $\chi^2_1 = 4.32$    | p = 0.057 |
| Time spent in E1 (salivation into phloem) as a percentage of the total time spent in all phloem phases (not transformed) † | 16.37%<br>LQR: 6.90%<br>UQR: 45.61% (26)                             | 8.93%<br>LQR: 4.63%<br>UQR: 22.12% (20)     | $\chi^2_1 = 1.13$                                                                              | p = 0.285 | $\chi^2_1 = 18.20$ | p = <0.001 | $\chi^2_1 = 2.02$    | p = 0.154 |
| E2 (phloem ingestion) index (not transformed) †                                                                            | 29.44 %<br>LQR: 5.25%<br>UQR: 76.85% (24)                            | 41.36%<br>LQR: 8.95%<br>UQR: 78.67% (20)    | $\chi^2_1 = 0.01$                                                                              | p = 0.987 | $\chi^2_1 = 6.72$  | p = 0.009  | $\chi^2_1 = 0.94$    | p = 0.329 |
| % of E2 phases which contained a period of sustained (>10min) phloem ingestion (not transformed) †                         | 45.00%<br>LQR: 27.08%<br>UQR: 100.00% (20)                           | 100.00%<br>LQR: 50.00%<br>UQR: 100.00% (17) | $\chi^2_1 = 0.37$                                                                              | p = 0.541 | $\chi^2_1 = 3.21$  | p = 0.047  | $\chi^2_1 = 0.90$    | p = 0.341 |

**Table 2:** Aphid feeding parameters (mean value  $\pm$  standard error) that were differentially affected by plant type and *Hamiltonella defensa* infection. Letters indicate which groups are significantly different based on pairwise comparisons using differences in the least square means analysis. Numbers in parenthesis indicate the total number of individuals which displayed each parameter, and the total number of individuals tested is indicated at the top of the column. Data marked with  $\dagger$  display median alongside the upper and lower inter quartile ranges.

| Description of Response Variable Assessed<br>(transformation used)                                    | <i>H. defensa</i> infection – plant type combination (n) |                                                      |                                                      |                                                         | Statistical results for each Explanatory Variable |              |  |                      |           |  |
|-------------------------------------------------------------------------------------------------------|----------------------------------------------------------|------------------------------------------------------|------------------------------------------------------|---------------------------------------------------------|---------------------------------------------------|--------------|--|----------------------|-----------|--|
|                                                                                                       | <i>Hd</i> –ve Concerto<br>(max = 14)                     | <i>Hd</i> +ve Concerto<br>(max = 10)                 | <i>Hd</i> –ve Hsp5 (max = 14)                        | <i>Hd</i> +ve Hsp5 (max = 11)                           | Plant                                             | Endosymbiont |  | Plant x Endosymbiont |           |  |
| % of time spent probing into plant tissue $\dagger$ (not transformed)                                 | 91.66% <sup>ab</sup> LQR: 91.66<br>UQR: 93.82<br>(14)    | 93.68% <sup>a</sup> LQR: 91.68<br>UQR: 95.45<br>(10) | 97.89% <sup>a</sup> LQR: 93.32<br>UQR: 99.53<br>(14) | 89.15% <sup>b</sup><br>LQR: 75.04<br>UQR: 98.78<br>(11) | $X^2_1 = 0.09$                                    | P = 0.752    |  | $X^2_1 = 0.947$      | P = 0.330 |  |
| Total time spent probing plant tissue (not transformed)                                               | 19048.02 s $\pm$ 474.76 s <sup>a</sup><br>(14)           | 19792.08 s $\pm$ 248.27 s <sup>a</sup><br>(10)       | 19647.97 s $\pm$ 444.58 s <sup>a</sup><br>(14)       | 16376.19 s $\pm$ 1664.46 s <sup>b</sup><br>(11)         | $X^2_1 = 2.08$                                    | P = 0.148    |  | $X^2_1 = 1.31$       | P = 0.251 |  |
| Number of C (mesophyll pathway) phases (sqrt)                                                         | 12.85 $\pm$ 1.96 <sup>ab</sup> (14)                      | 10.50 $\pm$ 1.51 <sup>ab</sup> (10)                  | 8.50 $\pm$ 1.26 <sup>a</sup> (14)                    | 17.18 $\pm$ 4.53 <sup>b</sup> (11)                      | $X^2_1 = 0.03$                                    | p = 0.846    |  | $X^2_1 = 1.56$       | p = 0.210 |  |
| Number of brief probes (< 3 mins) into plant tissue (sqrt)                                            | 1.35 $\pm$ 0.30 <sup>a</sup> (11)                        | 0.50 $\pm$ 0.26 <sup>b</sup> (3)                     | 0.78 $\pm$ 0.23 <sup>ab</sup> (7)                    | 1.36 $\pm$ 0.38 <sup>ab</sup> (7)                       | $X^2_1 = 0.02$                                    | p = 0.878    |  | $X^2_1 = 0.09$       | p = 0.751 |  |
| Number of probes into plant tissue (not transformed)                                                  | 6.57 $\pm$ 1.06 <sup>a</sup> (14)                        | 4.30 $\pm$ 0.74 <sup>ab</sup> (10)                   | 3.99 $\pm$ 0.73 <sup>b</sup> (14)                    | 6.36 $\pm$ 1.02 <sup>ab</sup> (11)                      | $X^2_1 = 0.88$                                    | P = 0.347    |  | $X^2_1 = 0.04$       | P = 0.827 |  |
| Total duration of the first probe into plant tissue (not transformed)                                 | 4004.58 s $\pm$ 1585.71 s <sup>ab</sup><br>(14)          | 6790.5 s $\pm$ 2413.59 s <sup>a</sup><br>(10)        | 7499.64 s $\pm$ 2138.37 s <sup>a</sup><br>(14)       | 1307.63 s $\pm$ 399.07 s <sup>b</sup><br>(11)           | $X^2_1 = 0.03$                                    | P = 0.845    |  | $X^2_1 = 0.97$       | P = 0.322 |  |
| Number of probes into plant tissue in the second hour (log)                                           | 2.00 $\pm$ 3.77 <sup>b</sup> (14)                        | 1.30 $\pm$ 0.21 <sup>ab</sup> (10)                   | 1.21 $\pm$ 0.15 <sup>a</sup> (14)                    | 2.09 $\pm$ 0.43 <sup>b</sup> (11)                       | $X^2_1 = 0.19$                                    | p = 0.657    |  | $X^2_1 = 0.05$       | p = 0.816 |  |
| Total time spent not probing plant tissue (sqrt)                                                      | 2222.85 s $\pm$ 455.44 s <sup>ab</sup><br>(14)           | 1348.83 s $\pm$ 210.27 s <sup>ab</sup><br>(10)       | 1190.47 s $\pm$ 453.83 s <sup>a</sup><br>(14)        | 3174.05 s $\pm$ 1051.14 s <sup>b</sup><br>(11)          | $X^2_1 = 0.07$                                    | P = 0.780    |  | $X^2_1 = 0.498$      | P = 0.479 |  |
| Total number of non-probing phases (not transformed)                                                  | 5.57 $\pm$ 1.06 <sup>a</sup><br>(14)                     | 3.30 $\pm$ 0.74 <sup>ab</sup><br>(10)                | 2.92 $\pm$ 0.73 <sup>b</sup><br>(14)                 | 5.36 $\pm$ 1.02 <sup>ab</sup><br>(11)                   | $X^2_1 = 0.88$                                    | P = 0.347    |  | $X^2_1 = 0.04$       | P = 0.827 |  |
| Number of probes into plant tissue until first E (phloem) phase (phloem contact) (log)                | 2.50 $\pm$ 0.34 <sup>a</sup> (14)                        | 1.80 $\pm$ 0.29 <sup>a</sup> (10)                    | 2.57 $\pm$ 0.71 <sup>a</sup> (14)                    | 5.00 $\pm$ 1.10 <sup>b</sup> (11)                       | $X^2_1 = 4.87$                                    | P = 0.027    |  | $X^2_1 = 0.92$       | P = 0.336 |  |
| Time from first probe into plant tissue until first sE2 (sustained phloem feeding phase) phase (sqrt) | 12284.97 s $\pm$ 2033.97 <sup>a</sup><br>(11)            | 5243.38 s $\pm$ 1634.65 s <sup>b</sup><br>(10)       | 127729.06 s $\pm$ 1975.25 s <sup>a</sup><br>(9)      | 15901.41 s $\pm$ 1786.35 s <sup>a</sup><br>(7)          | $X^2_1 = 7.77$                                    | P = 0.005    |  | $X^2_1 = 0.92$       | P = 0.337 |  |
| Total time spent in E2 phase (not transformed)                                                        | 5879.69 s $\pm$ 1660.46 s <sup>ab</sup><br>(14)          | 8042.94 s $\pm$ 1749.09 s <sup>a</sup><br>(10)       | 7369.52 s $\pm$ 1561.35 s <sup>a</sup><br>(12)       | 4934.72 s $\pm$ 1281.47 s <sup>b</sup><br>(10)          | $X^2_1 = 0.05$                                    | P = 0.820    |  | $X^2_1 = 0.13$       | P = 0.715 |  |
| Longest period of E2 (not transformed)                                                                | 4800 $\pm$ 1562.49 s <sup>ab</sup><br>(14)               | 6256.68 $\pm$ 1530.16 s <sup>ab</sup><br>(10)        | 6237.50 $\pm$ 1504.46 s <sup>a</sup><br>(12)         | 2941.27 $\pm$ 944.83 s <sup>b</sup><br>(10)             | $X^2_1 = 0.08$                                    | P = 0.771    |  | $X^2_1 = 0.50$       | P = 0.478 |  |
| Total number of pd in the third hour (sqrt)                                                           | 15.71 $\pm$ 4.16 <sup>a</sup><br>(11)                    | 10.40 $\pm$ 3.00 <sup>a</sup><br>(7)                 | 16.35 $\pm$ 3.57 <sup>a</sup><br>(12)                | 54.27 $\pm$ 18.85 <sup>b</sup><br>(10)                  | $X^2_1 = 7.30$                                    | P = 0.006    |  | $X^2_1 = 2.63$       | P = 0.104 |  |
| Total number of pd in the fourth hour (sqrt)                                                          | 14.85 $\pm$ 4.70 <sup>ab</sup> (8)                       | 5.10 $\pm$ 2.75 <sup>a</sup> (3)                     | 5.50 $\pm$ 2.06 <sup>a</sup> (9)                     | 35.09 $\pm$ 14.30 <sup>b</sup> (8)                      | $X^2_1 = 0.90$                                    | P = 0.341    |  | $X^2_1 = 0.60$       | P = 0.437 |  |

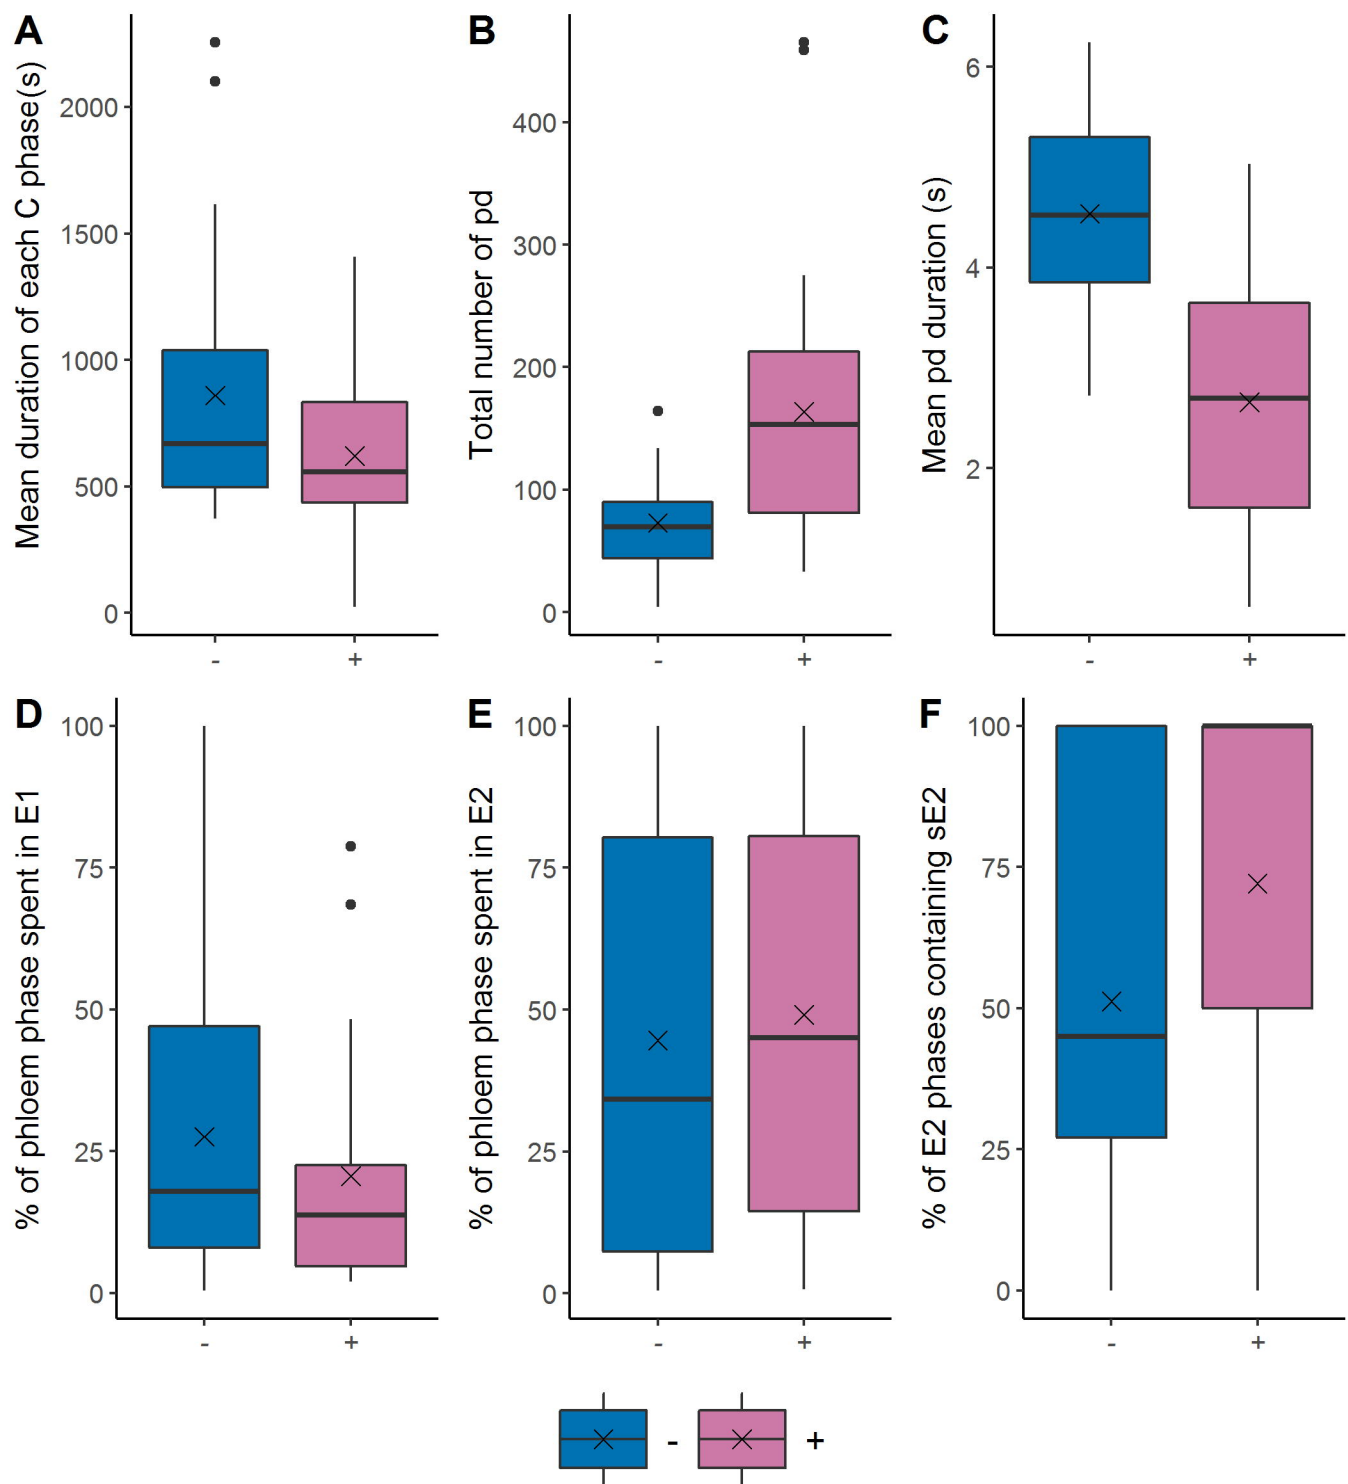

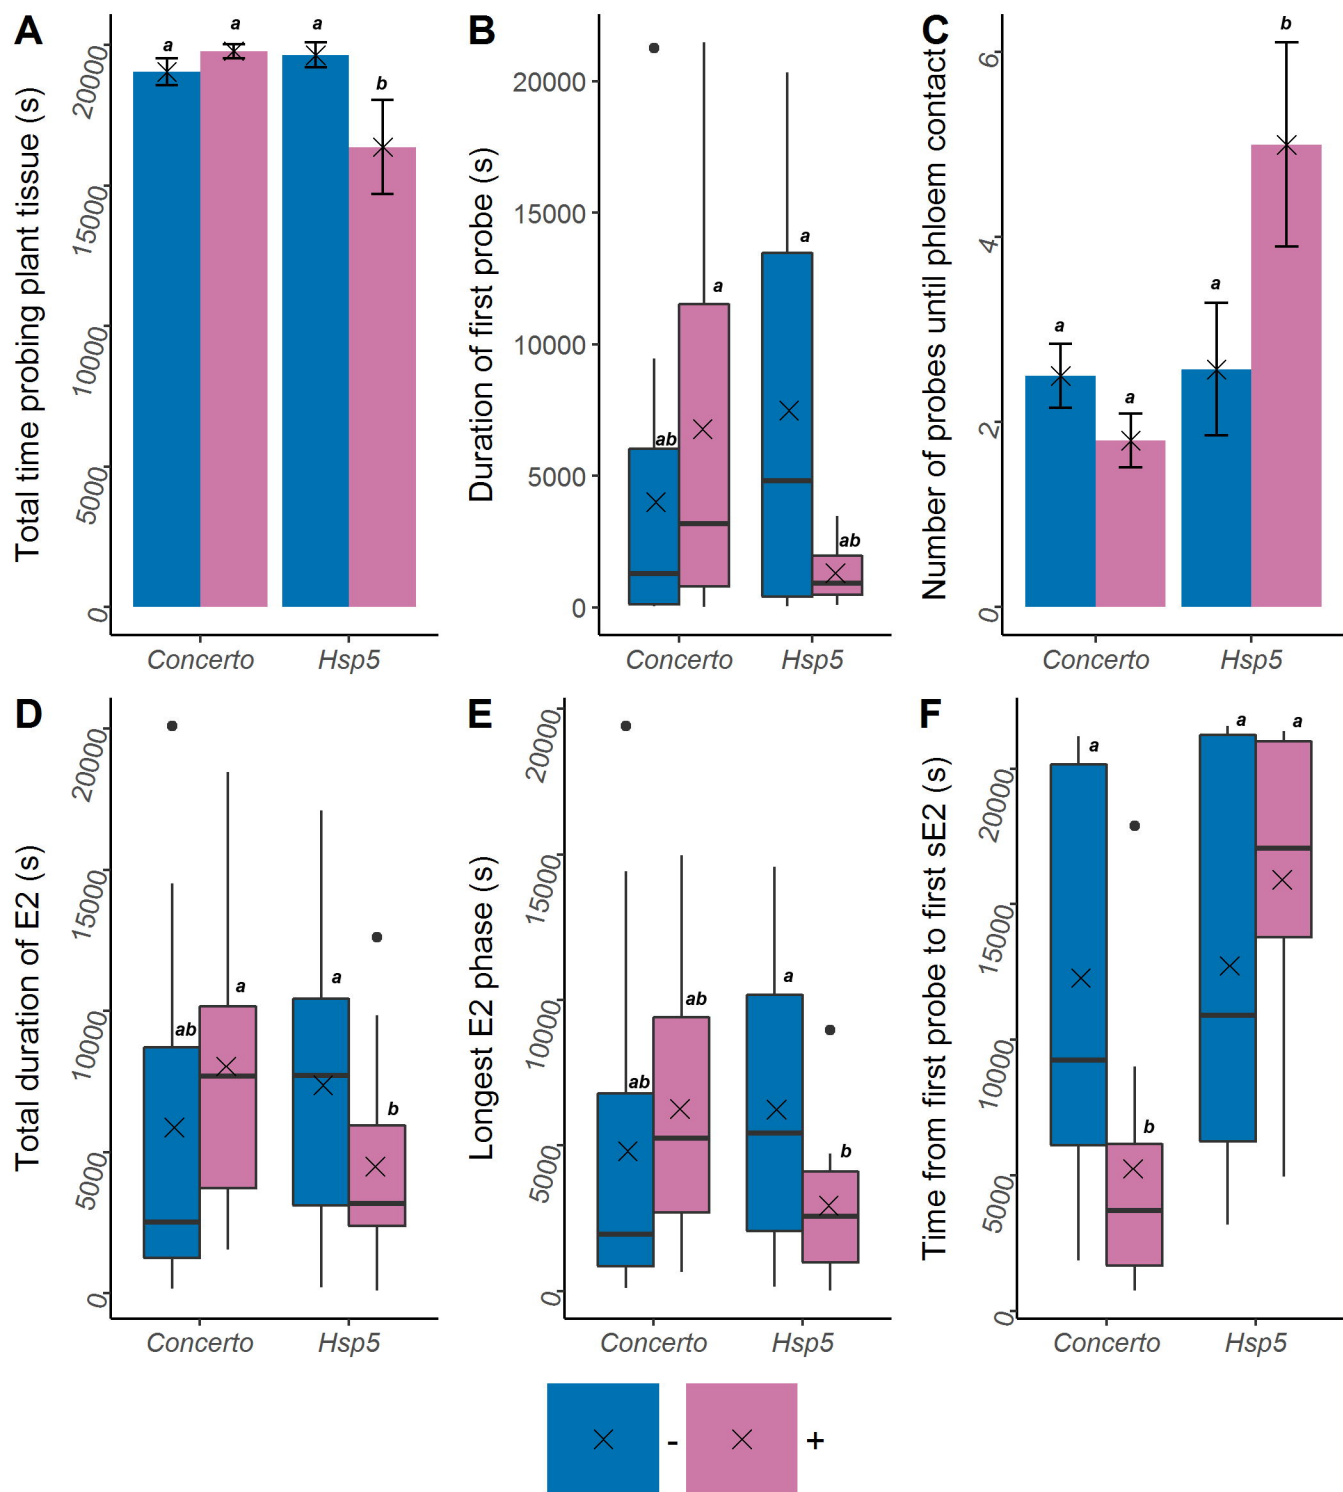

Source: https://www.biorxiv.org/content/10.1101/652974v1.full.pdf
